# Supplementary material for: Morphology and Dynamics in Hydrated Graphene Oxide/Branched Poly(ethyleneimine) Nanocomposites: An In Silico Investigation
Source: MDPI journal article supplement (doi:10.3390/nano13121865), 2023-06-15
Supplement: s1 [file s1]

## Supplementary Material

### Morphology and Dynamics in Hydrated Graphene-Oxide/Branched Poly(ethyleneimine) Nanocomposites: an in-Silico Investigation

Anastassia Rissanou <sup>1</sup>, Apostolos Konstantinou <sup>2</sup> and Kostas Karatasos <sup>2,\*</sup>

1 Theoretical & Physical Chemistry Institute, National Hellenic Research Foundation, 48 Vassileos Constantinou Avenue, 11635 Athens, Greece; trissanou@eie.gr

2 Department of Chemical Engineering, University of Thessaloniki, P.O. BOX 420, 54124 Thessaloniki, Greece

\* Correspondence: kkaratas@cheng.auth.gr

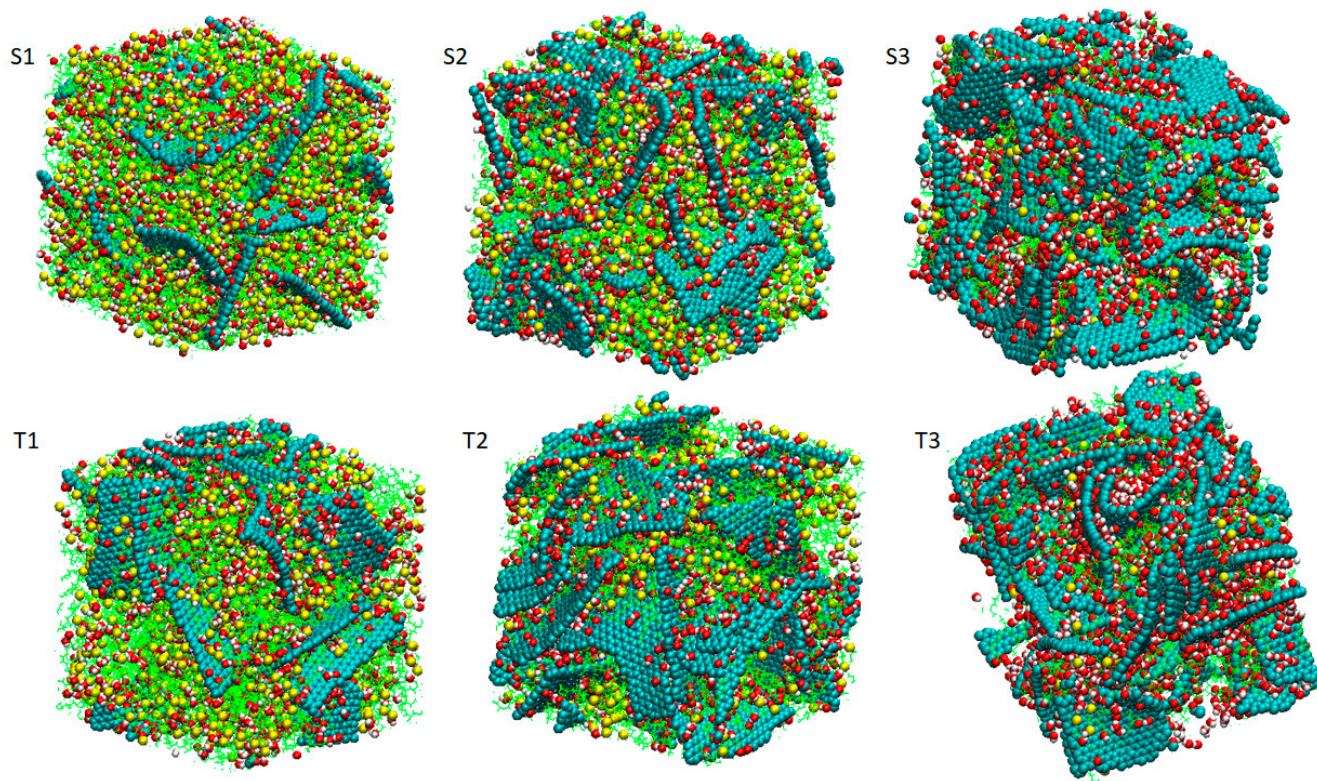

**Figure S1.** Initial configurations of the simulated systems. GO flakes appear in dark cyan, HBPEI molecules in green, oxygen atoms in red, hydrogen atoms in white and Cl<sup>-</sup> counterions in yellow

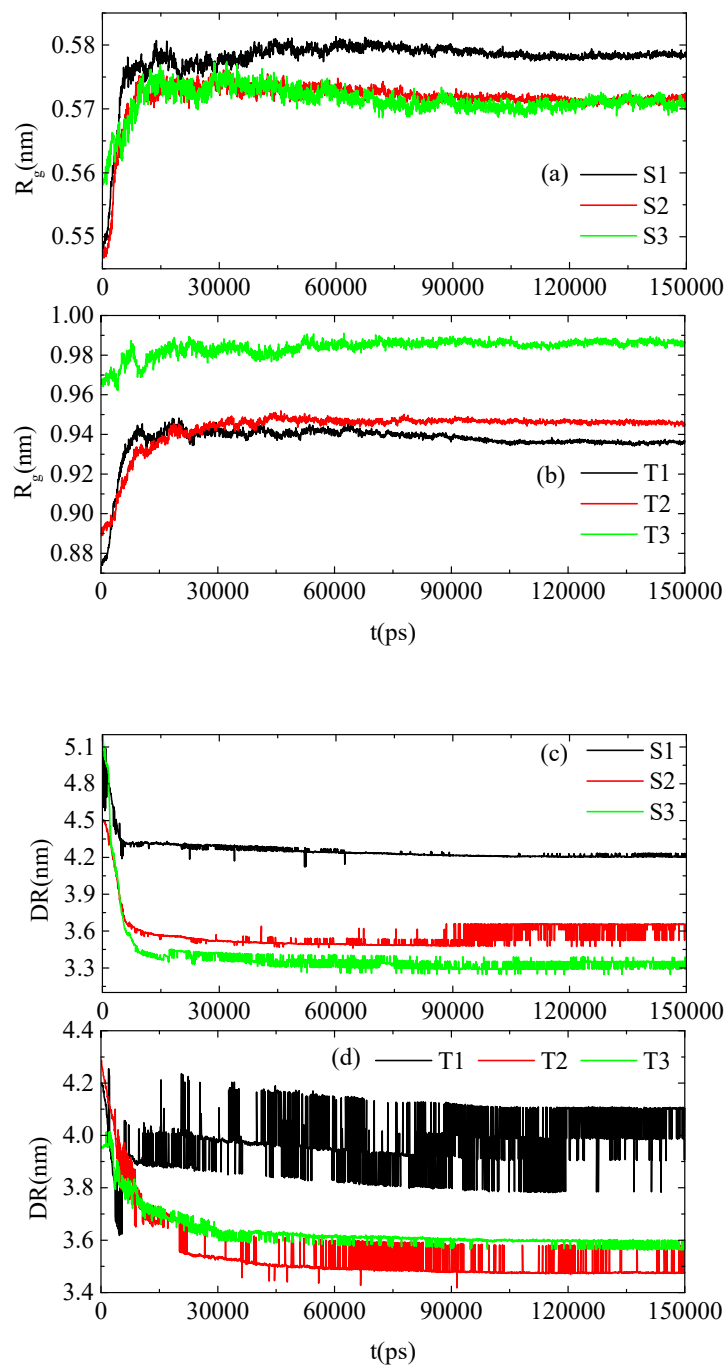

**Figure S2.** (a, b) Radius of gyration ( $R_g$ ) of polymer chains as a function of time for S1,S2,S3 and T1,T2,T3 respectively; (c, d) Average pair distance between the center of mass of GO flakes as a function of time for S1,S2,S3 and T1,T2,T3 respectively.

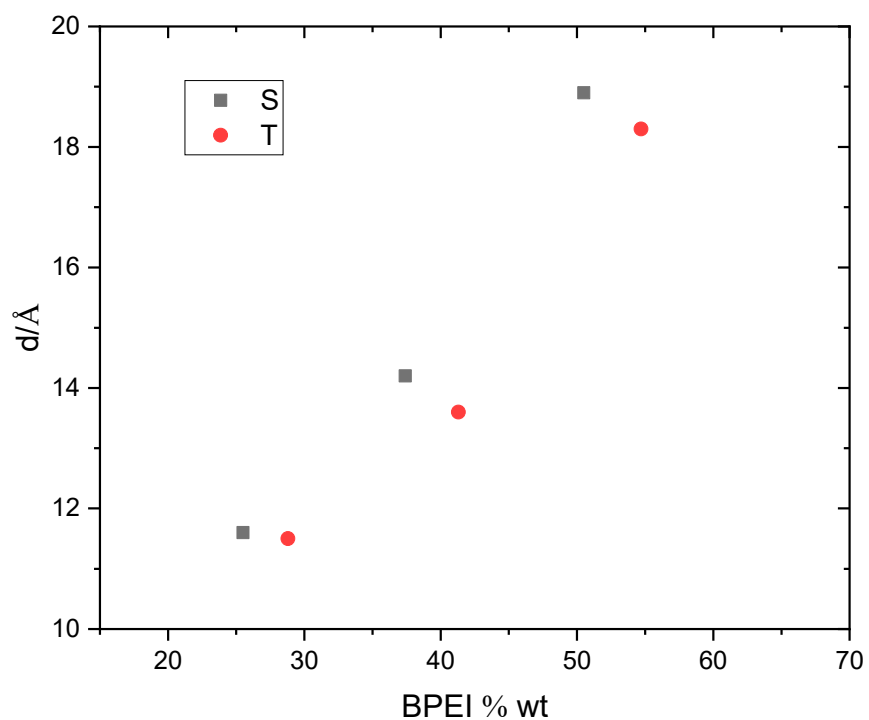

**Figure S3.** The shortest separation between the centers of mass of the GO flakes as a function of the systems' content in polymer.

**Table S1.** Average radius of gyration of the HBPEI polymers in the examined systems

| System | $R_g(\text{\AA})$ |
|--------|-------------------|
| S1     | $5.775 \pm 0,003$ |
| S2     | $5.705 \pm 0,004$ |
| S3     | $5.690 \pm 0,007$ |
| T1     | $9.332 \pm 0,006$ |
| T2     | $9.421 \pm 0,006$ |
| T3     | $9.823 \pm 0,010$ |

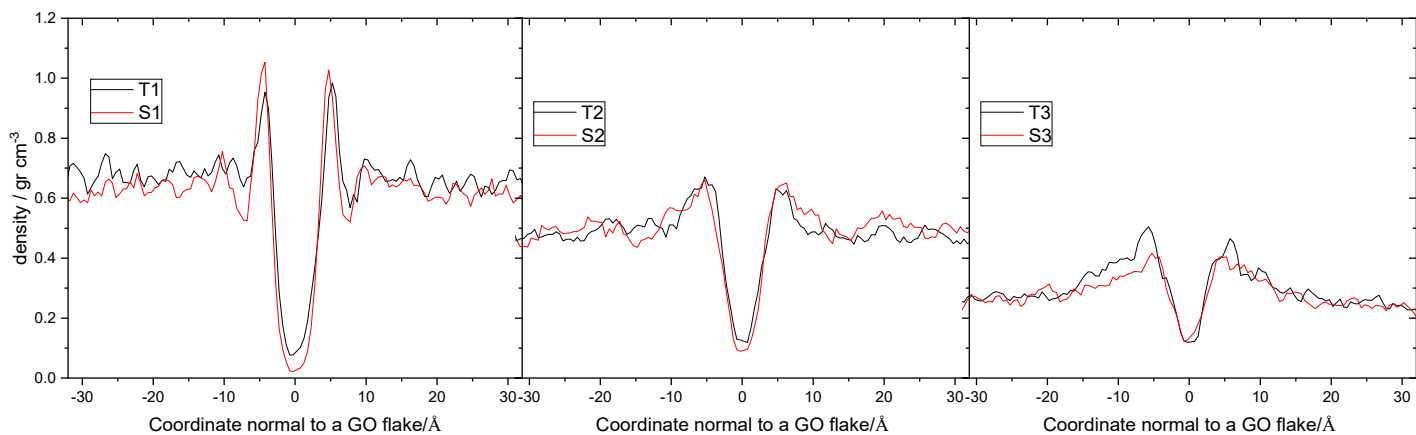

**Figure S4.** Comparison of the density profiles of the BPEI polymers in systems with comparable polymer content, along a direction normal to a GO flake

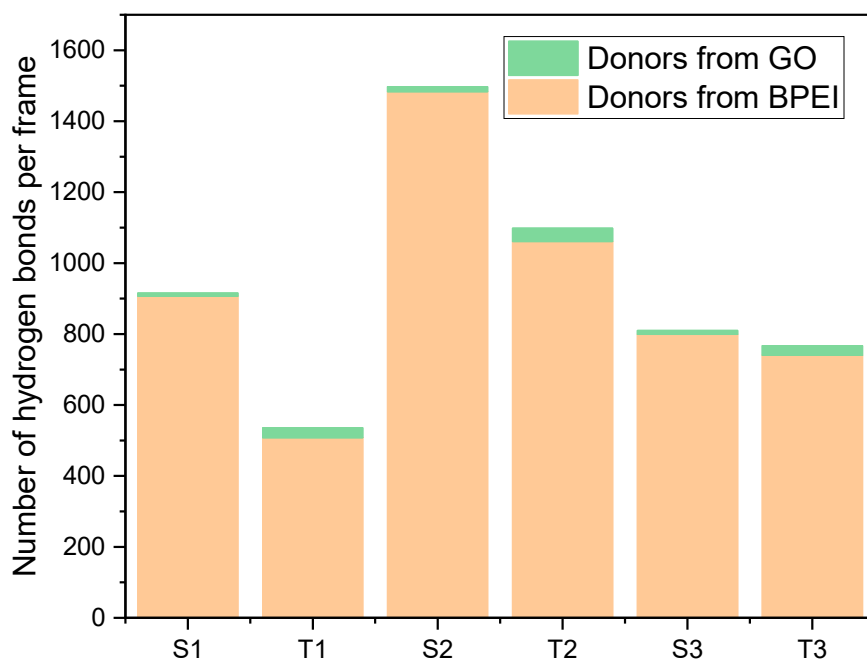

**Figure S5.** Comparison of the contribution from BPEI and GO donors to the total number of the hydrogen bonds formed between them.

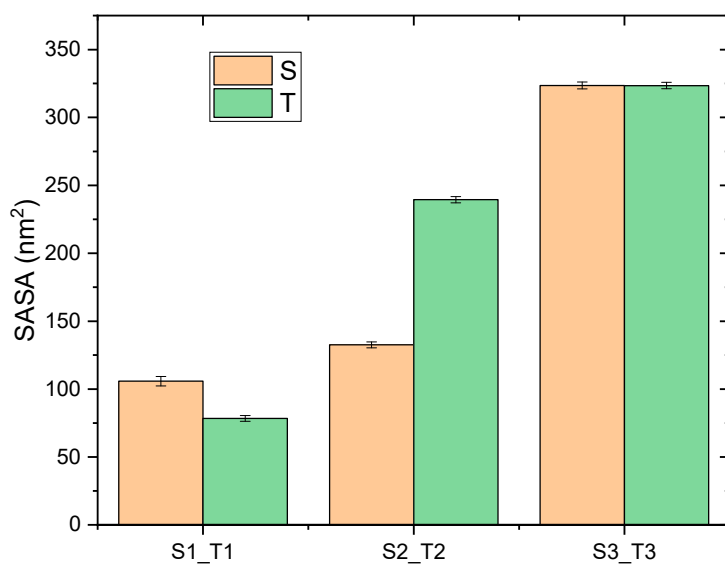

**Figure S6.** Solvent access surface area for water molecules in the examined models

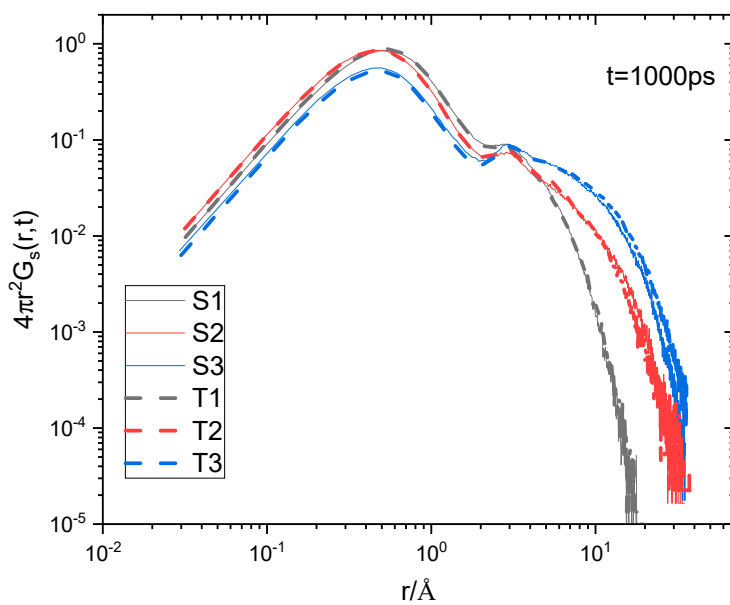

**Figure S7.** Comparison of the self Van Hove functions arising from the centers of mass of water at a constant timescale of 1000ps

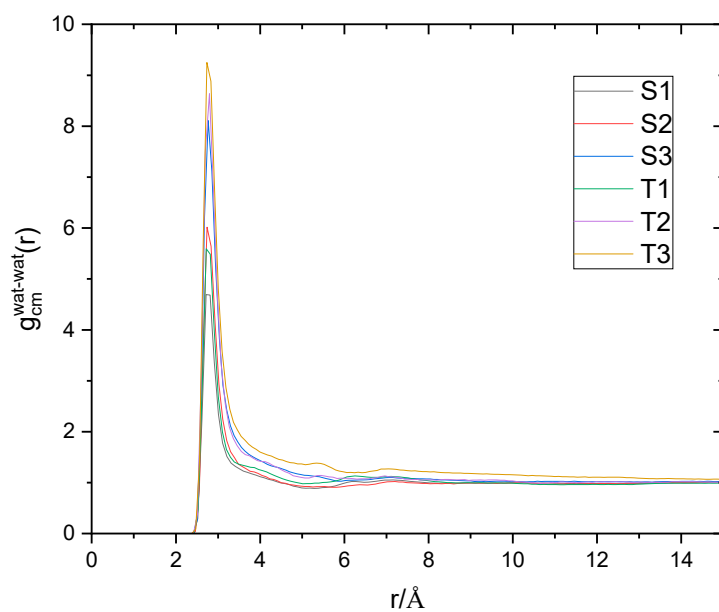

**Figure S8.** The radial distribution function arising from the centers of mass of the water molecules. The main peak is centered at 2.8Å

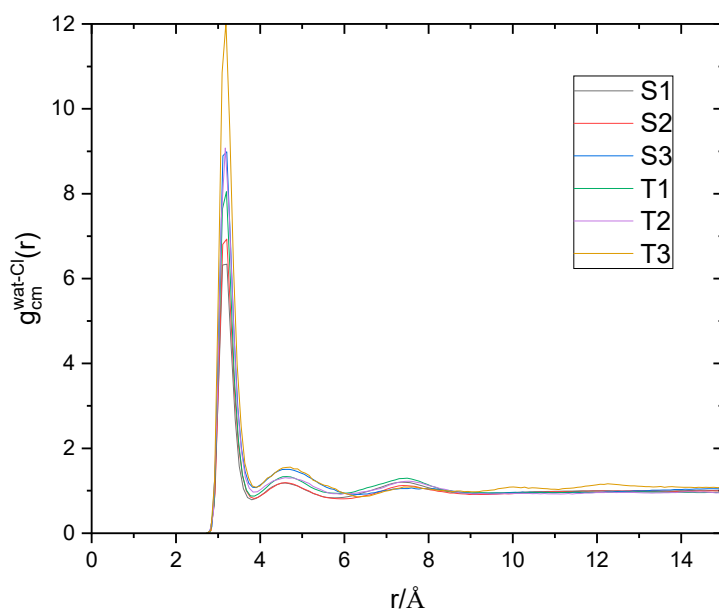

**Figure S9.** The radial distribution function arising from the Chlorine ions. The main peak is centered at 3.2Å.

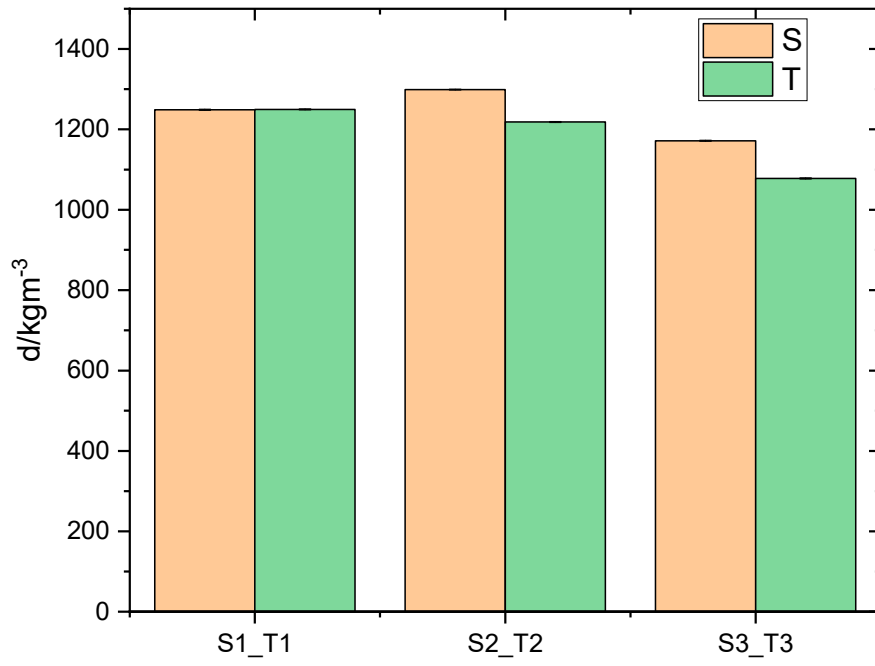

**Figure S10.** Average density of the simulated models.
